# Supplementary material for: A Magnetic Reduced Graphene Oxide Nanocomposite: Synthesis, Characterization, and Application for High-Efficiency Detoxification of Aflatoxin B1
Source: MDPI journal article supplement (doi:10.3390/toxins16010057), 2024-01-19
Supplement: s1 [file s1]

# Supplementary material: A Magnetic Reduced Graphene Oxide Nanocomposite: Synthesis, Characterization, and Application for High-Efficiency Detoxification of Aflatoxin B<sub>1</sub>

**Table S1.** Nitrogen sorption-desorption experiments of the Fe<sub>3</sub>O<sub>4</sub>@rGOs produced under different preparation temperatures.

| Reaction temperature (°C) | Surface area (m <sup>2</sup> ·g <sup>-1</sup> ) | Pore volume (cm <sup>3</sup> ·g <sup>-1</sup> ) | Pore diameter (nm) |
|---------------------------|-------------------------------------------------|-------------------------------------------------|--------------------|
| 180                       | 80.240                                          | 0.063                                           | 3.066              |
| 200                       | 87.094                                          | 0.483                                           | 3.428              |
| 220                       | 57.145                                          | 0.351                                           | 3.070              |

**Table S2.** Maximum adsorption capacity (Q<sub>m</sub>/mg·g<sup>-1</sup>) of AFB<sub>1</sub> by various absorbents in previous reports.

| Absorbents                                                 | Q <sub>m</sub> (mg·g <sup>-1</sup> ) | References    |
|------------------------------------------------------------|--------------------------------------|---------------|
| Functionalized nanoflower-like hydroxyl magnesium silicate | 27.34                                | [19]          |
| Modified nano-montmorillonite                              | 9.33                                 | [20]          |
| Magnetic graphene composite adsorbents                     | 1.48                                 | [29]          |
| Tannic acid pillared bentonite composite                   | 86                                   | [37]          |
| Cross-linked chitosan                                      | 5.67                                 | [41]          |
| Grape pomace                                               | 15.0                                 | [42]          |
| Chitosan modified GO                                       | 9.6                                  | [43]          |
| Flower-like mesoporous magnesium silicate composites       | 21.26                                | [44]          |
| Nonionic surfactant modified montmorillonite               | 2.78                                 | [45]          |
| Fe <sub>3</sub> O <sub>4</sub> @ rGO                       | 82.64                                | In this study |
